# Supplementary material for: Derivation and validation of a simple multidimensional index incorporating exercise capacity parameters for survival prediction in idiopathic pulmonary fibrosis
Source: PubMed Central journal article supplement — Thorax. 2022 Mar 24;78(4):368–75. doi: 10.1136/thoraxjnl-2021-218440 (PMC10086452; doi:10.1136/thoraxjnl-2021-218440), 2022-03-24
Supplement: thoraxjnl-2021-218440supp001.pdf [file thoraxjnl-2021-218440supp001.pdf]

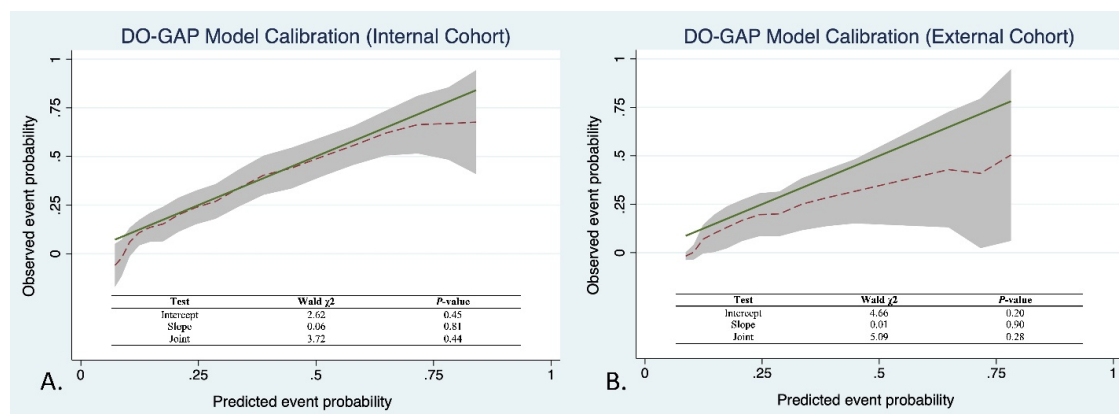

**Figure E1:** A) Calibration of the Distance-Oxygen-Gender-Age-Physiology (DO-GAP) index in the internal cohort B) Calibration of the DO-GAP index in the external cohort. Smoothed pseudovalues (dashed lines) with pointwise 95% confidence intervals (shaded area) are plotted against predicted event probabilities at 2 years of follow-up. The solid line is the line of identity, denoting perfect calibration. Tables beneath the figures are the results of statistical tests of overall model calibration over multiple time points (yearly over 3 years of follow-up) where the null hypothesis assumes the intercept equal to 0 and the slope of the model equal to 1.

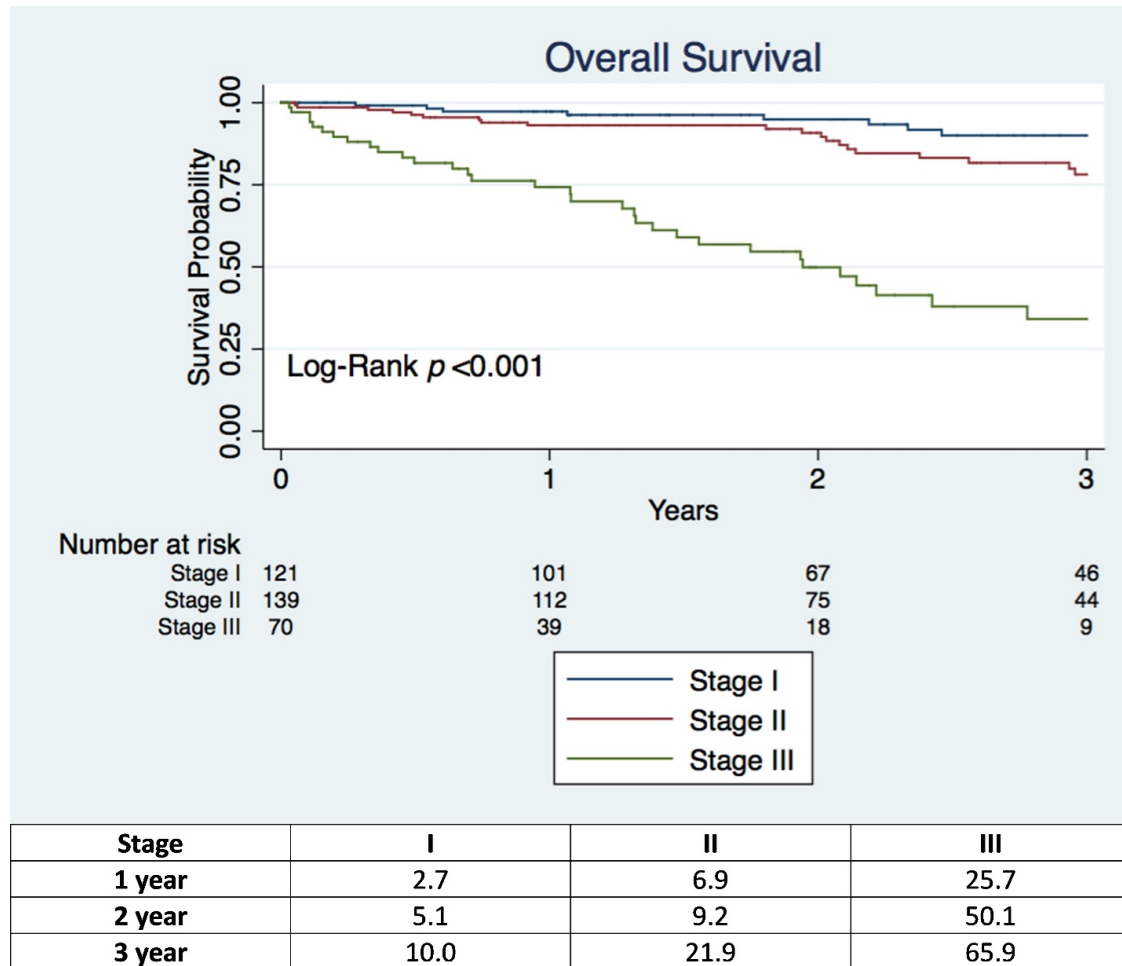

**Figure E2:** Kaplan-Meier survival curves for patients treated with antifibrotic therapy from time of initial pulmonary function testing based on idiopathic pulmonary fibrosis stage as defined by the proposed distance-oxygen-gender-age-physiology (DO-GAP) index. Table beneath figure includes the estimated observed overall mortality (%) by DO-GAP stage based on patients on antifibrotic therapy in the entire cohort.

**Table E1.** Refit GAP index constructed utilizing the pre-specified categorical assignments from the original GAP index and linear rescaling of the regression coefficients in the derivation set.

| <b>Predictor</b>   | <b>Category</b>          | <b>Points</b> |
|--------------------|--------------------------|---------------|
| <b>Gender</b>      | Female                   | 0             |
|                    | Male                     | 1             |
| <b>Age (years)</b> | ≤60                      | 0             |
|                    | 61-65                    | 2             |
|                    | >65                      | 5             |
| <b>Physiology</b>  | <b>FVC, % predicted</b>  |               |
|                    | >75                      | 0             |
|                    | 50-75                    | 11            |
|                    | <50                      | 18            |
|                    | <b>DLCO, % predicted</b> |               |
|                    | >55                      | 0             |
|                    | 36-55                    | 12            |
|                    | ≤35                      | 25            |
|                    | Cannot perform           | 25            |

**Table E2.** Change in classified stage in the validation set based on application of the DO-GAP index staging system compared to the original GAP index staging system

| GAP Stage      | Patients (N) | DO-GAP Stage (N) |     |     | Percent reclassified (%) |
|----------------|--------------|------------------|-----|-----|--------------------------|
|                |              | I                | II  | III |                          |
| I              | 52           | 42               | 9   | 1   | 19.2                     |
| II             | 136          | 42               | 79  | 15  | 41.9                     |
| III            | 93           | 0                | 20  | 73  | 21.5                     |
| <b>Overall</b> | 281          | 84               | 108 | 89  | 31.0                     |

GAP, gender-age-physiology; DO-GAP, distance-oxygen-gender-age-physiology

**Table E3.** Sensitivity analysis in the derivation set of the association of predictors with mortality in patients with idiopathic pulmonary fibrosis treating lung transplantation as a competing risk of death

| Variables          | Univariate analysis |         | Multivariable analysis |         |
|--------------------|---------------------|---------|------------------------|---------|
|                    | SHR (95% CI)        | P-value | SHR (95% CI)           | P-value |
| GAP index          | 1.48 (1.27-1.72)    | <0.001  | 1.22 (1.05-1.43)       | 0.011   |
| Exertional hypoxia | 3.56 (2.28-5.55)    | <0.001  | 2.31 (1.39-3.83)       | 0.001   |
| 6MWD <250m         | 4.55 (2.90-7.13)    | <0.001  | 2.73 (1.62-4.60)       | <0.001  |

SHR, subdistribution hazard ratio; 6MWD, six-minute walk distance

**Table E4.** Sub-group analysis comparing the added discriminative value of the DO-GAP index compared to the GAP index in patients on antifibrotic therapy

| Model                  | C-statistic (95% CI) | Difference in C-statistic compared to refit GAP |         | NRI (%) (95% CI) <sup>a</sup> | IDI <sub>event</sub> (95% CI) <sup>a</sup> | IDI <sub>non-event</sub> (95% CI) <sup>a</sup> | IDI <sup>a</sup>      |
|------------------------|----------------------|-------------------------------------------------|---------|-------------------------------|--------------------------------------------|------------------------------------------------|-----------------------|
|                        |                      | Difference (95% CI)                             | P-value |                               |                                            |                                                |                       |
| <b>GAP index</b>       | 0.696 (0.595-0.796)  | 0.002 (-0.038-0.041)                            | 0.929   | -12.5 (-55.8-45.2)            | 0.003 (-0.010-0.040)                       | 0.000 (-0.001-0.005)                           | -0.003 (-0.011-0.045) |
| <b>Refit GAP index</b> | 0.694 (0.599-0.788)  | -                                               | -       | -                             | -                                          | -                                              | -                     |
| <b>DO-GAP index</b>    | 0.755 (0.665-0.844)  | 0.061 (-0.013-0.135)                            | 0.104   | 42.8 (3.5-83.3)               | 0.060 (0.007-0.160)                        | 0.006 (0.001-0.018)                            | 0.066 (0.007-0.178)   |

NRI, net reclassification improvement; IDI, incremental discrimination improvement; GAP, gender-age-physiology; DO-GAP, distance-oxygen-gender-age-physiology

<sup>a</sup>Improvement comparisons made to the GAP index after refitting original GAP index to the derivation set

**Table E5.** Sub-group analysis comparing the added discriminative value of the DO-GAP index compared to the GAP index in patients evaluated within 5 years of study completion

| Model                  | C-statistic (95% CI) | Difference in C-statistic compared to refit GAP |         | NRI (%) (95% CI) <sup>a</sup> | IDI <sub>event</sub> (95% CI) <sup>a</sup> | IDI <sub>non-event</sub> (95% CI) <sup>a</sup> | IDI                  |
|------------------------|----------------------|-------------------------------------------------|---------|-------------------------------|--------------------------------------------|------------------------------------------------|----------------------|
|                        |                      | Difference (95% CI)                             | P-value |                               |                                            |                                                |                      |
| <b>GAP index</b>       | 0.758 (0.661-0.855)  | -0.005 (-0.045-0.035)                           | 0.807   | 9.7 (-50.0, 44.0)             | 0.008 (-0.012-0.070)                       | 0.000 (-0.002-0.012)                           | 0.008 (-0.014-0.082) |
| <b>Refit GAP index</b> | 0.763 (0.674-0.852)  | -                                               | -       | -                             | -                                          | -                                              | -                    |
| <b>DO-GAP index</b>    | 0.806 (0.729-0.883)  | 0.043 (-0.028-0.114)                            | 0.232   | 31.8 (16.0-74.8)              | 0.050 (0.001-0.125)                        | 0.008 (0.001-0.022)                            | 0.058 (0.002-0.143)  |

NRI, net reclassification improvement; IDI, incremental discrimination improvement; GAP, gender-age-physiology; DO-GAP, distance-oxygen-gender-age-physiology

<sup>a</sup>Improvement comparisons made to the GAP index after refitting original GAP index to the derivation set
